# Supplementary material for: Effectiveness of internet-delivered education and home exercise supported by behaviour change SMS on pain and function for people with knee osteoarthritis: a randomised controlled trial protocol
Source: PubMed Central journal article supplement (PMC6661079; doi:10.1186/s12891-019-2714-x), 2019-07-27
Supplement: 12891_2019_2714_MOESM1_ESM.pdf [file 12891_2019_2714_MOESM1_ESM.pdf]

| <b>Barrier</b>                                                     | <b>COM-B category</b>    | <b>TDF Domain</b>                            | <b>Relevant Intervention function</b>   | <b>BCT used within the SMS intervention</b>     |
|--------------------------------------------------------------------|--------------------------|----------------------------------------------|-----------------------------------------|-------------------------------------------------|
| 1. Forgetfulness                                                   | Psychological capability | 10. Memory, attention and decision processes | Training                                | 8.3 Habit formation                             |
|                                                                    |                          |                                              | Environmental restructuring             | 7.1 Prompts/cues                                |
|                                                                    |                          |                                              | Enablement                              | 3.1 Social support (unspecified)                |
|                                                                    |                          |                                              |                                         | 10.9 Self-reward                                |
|                                                                    |                          |                                              |                                         | 1.2 Problem Solving                             |
|                                                                    |                          |                                              | 1.4 Action Planning                     |                                                 |
| 2. Too tired                                                       | Psychological capability | 10. Memory, attention and decision processes | Education*                              | 5.1 Information about health consequences *     |
|                                                                    | Reflective motivation*   | 8. Intentions                                | Persuasion*                             | -                                               |
|                                                                    |                          |                                              | Training                                | -                                               |
|                                                                    |                          |                                              | Environmental restructuring             | -                                               |
|                                                                    |                          |                                              | Enablement                              | 1.4 Action planning                             |
|                                                                    |                          | 15.4 Self talk                               |                                         |                                                 |
|                                                                    |                          |                                              | 15.1 Verbal persuasion about capability |                                                 |
|                                                                    |                          |                                              | 1.2 Problem Solving                     |                                                 |
|                                                                    |                          |                                              | 8.7 Graded tasks                        |                                                 |
| 3. Knee pain limiting perceived ability to exercise                | Reflective motivation    | 4. Beliefs about Capabilities                | Education                               | 5.1 Information about health consequences       |
|                                                                    |                          |                                              | Persuasion                              | -                                               |
|                                                                    |                          |                                              | Enablement                              | 8.7 Graded tasks                                |
|                                                                    |                          |                                              |                                         | 12.4 Distraction                                |
|                                                                    |                          |                                              |                                         | 15.4 Self talk                                  |
|                                                                    |                          |                                              | 1.4 Action Planning                     |                                                 |
|                                                                    |                          |                                              | 1.2 Problem Solving                     |                                                 |
| 4. Concern exercise (causing) pain + Fear of damaging knee further | Reflective motivation    | 6. Beliefs about consequences                | Persuasion                              | 5.1 Information about health consequences       |
|                                                                    |                          |                                              | Enablement                              | 1.2 Problem Solving                             |
|                                                                    |                          |                                              |                                         | 1.4 Action planning                             |
| 5. Lack of improvement with exercises                              | Automatic motivation     | 7. Reinforcement                             | Training                                | 2.4 Self-monitoring outcome(s) of behaviour     |
|                                                                    |                          |                                              |                                         | 2.2 Feedback on behaviour                       |
|                                                                    |                          |                                              |                                         | 4.4 Behavioural experiments                     |
|                                                                    |                          |                                              |                                         | 4.1 Instruction on how to perform the behaviour |
|                                                                    |                          |                                              | Environmental restructuring             | -                                               |

|                                                                        |                       |                                         |                                                                   |                                                                                                                                                                                                                                                                                |
|------------------------------------------------------------------------|-----------------------|-----------------------------------------|-------------------------------------------------------------------|--------------------------------------------------------------------------------------------------------------------------------------------------------------------------------------------------------------------------------------------------------------------------------|
| 6.<br>Lack of enjoyment in exercise +<br>Boredom with exercise         | Automatic motivation  | 13. Emotion                             | Persuasion<br><hr/> Enablement                                    | 5.1 Information about health consequences<br><hr/> 12.4 Distraction<br><hr/> 15.4 Self talk<br><hr/> 10.9 Self-reward<br><hr/> 12.1 Restructuring the physical environment<br><hr/> 1.2 Problem Solving<br><hr/> 1.4 Action Planning<br><hr/> 3.1 Social support (unspecified) |
| 7.<br>Conflict with routines +<br>Lack of time                         | Reflective motivation | 11. Environmental context and resources | Training<br><hr/> Environmental restructuring<br><hr/> Enablement | 4.1 Instruction on how to perform the behaviour<br><hr/> -<br><hr/> 3.1 Social support – unspecified<br><hr/> 1.2 Problem solving<br><hr/> 1.4 Action Planning<br><hr/> 15.3 Focus on past success<br><hr/> 1.3 Goal setting (outcome)                                         |
| 8.<br>Family commitments +<br>Increased social strain +<br>Life events | Social Opportunity    | 12. Social influences                   | Environmental restructuring<br><hr/> Enablement                   | -<br><hr/> 1.4 Action Planning<br><hr/> 2.4 Self-monitoring of outcomes of behaviour<br><hr/> 15.1 Verbal persuasion about capability<br><hr/> 1.2 Problem solving<br><hr/> 15.4 Self talk<br><hr/> 15.3 Focus on past success<br><hr/> 1.1 Goal setting (behaviour)           |

BCT= Behaviour change technique

BCW=Behaviour Change Wheel

Dash (-) indicates no BCT messages used in final SMS library from this intervention function
