# Supplementary material for: Effectiveness of internet-delivered education and home exercise supported by behaviour change SMS on pain and function for people with knee osteoarthritis: a randomised controlled trial protocol
Source: PubMed Central journal article supplement (PMC6661079; doi:10.1186/s12891-019-2714-x), 2019-07-27
Supplement: 12891_2019_2714_MOESM2_ESM.pdf [file 12891_2019_2714_MOESM2_ESM.pdf]

| <b>Facilitator</b>                                      | <b>COM-B category</b>    | <b>TDF domain</b>             | <b>Relevant Intervention Function</b> | <b>BCT used within the SMS intervention</b>                         |
|---------------------------------------------------------|--------------------------|-------------------------------|---------------------------------------|---------------------------------------------------------------------|
| 1. Accurate disease knowledge                           | Psychological capability | 1. Knowledge                  | Education                             | 5.1 Information about health consequences                           |
| 2. Prioritising exercise                                | Psychological capability | 14. Behavioural regulation    | Education                             | 5.1 Information about health consequences                           |
|                                                         |                          |                               | Training                              | 4.1 Instruction on how to perform the behaviour<br>10.9 Self reward |
|                                                         |                          |                               | Enablement                            | 10.9 Self reward                                                    |
| 3. Integrating exercise into daily tasks                | Psychological capability | 14. Behavioural regulation    | Education                             | 5.1 Information about health consequences                           |
|                                                         |                          |                               | Training                              | 4.1 Instruction on how to perform the behaviour<br>10.9 Self reward |
|                                                         |                          |                               | Enablement                            | 10.9 Self reward                                                    |
| 4. Belief that you are taking control of own disability | Psychological capability | 4. Beliefs about Capabilities | Education                             | 5.1 Information about health consequences                           |
|                                                         |                          |                               | Persuasion                            | 5.1 Information about health consequences<br>6.2 Social Comparison  |
| 5. Perceived benefits of exercising                     | Psychological capability | 6. Beliefs about consequences | Education                             | 5.1 Information about health consequences                           |
|                                                         |                          |                               | Persuasion                            | 5.1 Information about health consequences<br>6.2 Social Comparison  |
| 6. Belief that exercise is good for health              | Psychological capability | 6. Beliefs about consequences | Education                             | 5.1 Information about health consequences                           |
|                                                         |                          |                               | Persuasion                            | 5.1 Information about health consequences<br>6.2 Social Comparison  |
| 7. Positive outcome expectations                        | Psychological capability | 6. Beliefs about consequences | Education                             | 5.1 Information about health consequences                           |
|                                                         |                          |                               | Persuasion                            | 5.1 Information about health consequences<br>6.2 Social Comparison  |
| 8. Long-term goals as well as short-term goals          | Psychological capability | 9. Goals                      | Education                             | 5.1 Information about health consequences                           |
|                                                         |                          |                               | Persuasion                            | 5.1 Information about health consequences<br>6.2 Social Comparison  |

|                                         |                      |                  |                             |                                                 |
|-----------------------------------------|----------------------|------------------|-----------------------------|-------------------------------------------------|
|                                         |                      |                  | Enablement                  | 10.9 Self reward                                |
| 9. Receiving medical advice to exercise | Automatic motivation | 7. Reinforcement | Training                    | 4.1 Instruction on how to perform the behaviour |
|                                         |                      |                  |                             | 10.9 Self reward                                |
|                                         |                      |                  | Environmental restructuring | -                                               |

BCT= Behaviour change technique

BCW=Behaviour Change Wheel

Dash (-) indicates no BCT messages used in final SMS library from this intervention function
